# Supplementary material
Source: PubMed Central journal article supplement (PMC8643505)

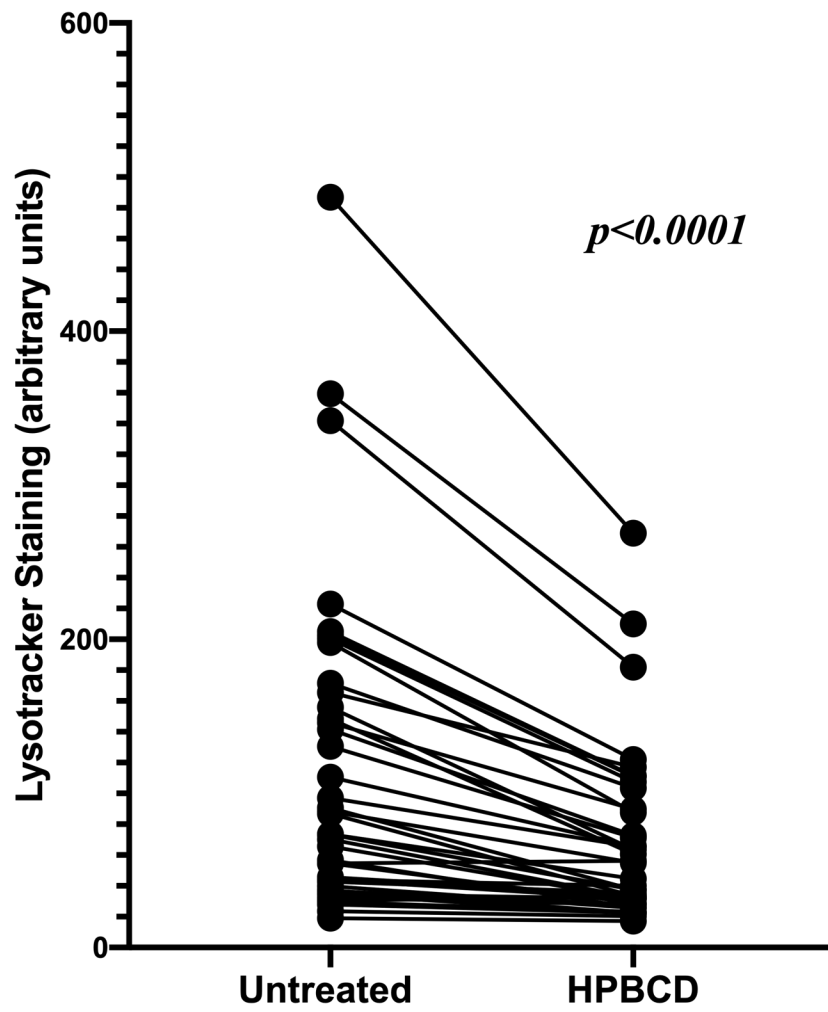

Supplement: supplemental_fig_s1_ddab194.pdf [file supplemental_fig_s1_ddab194.pdf]

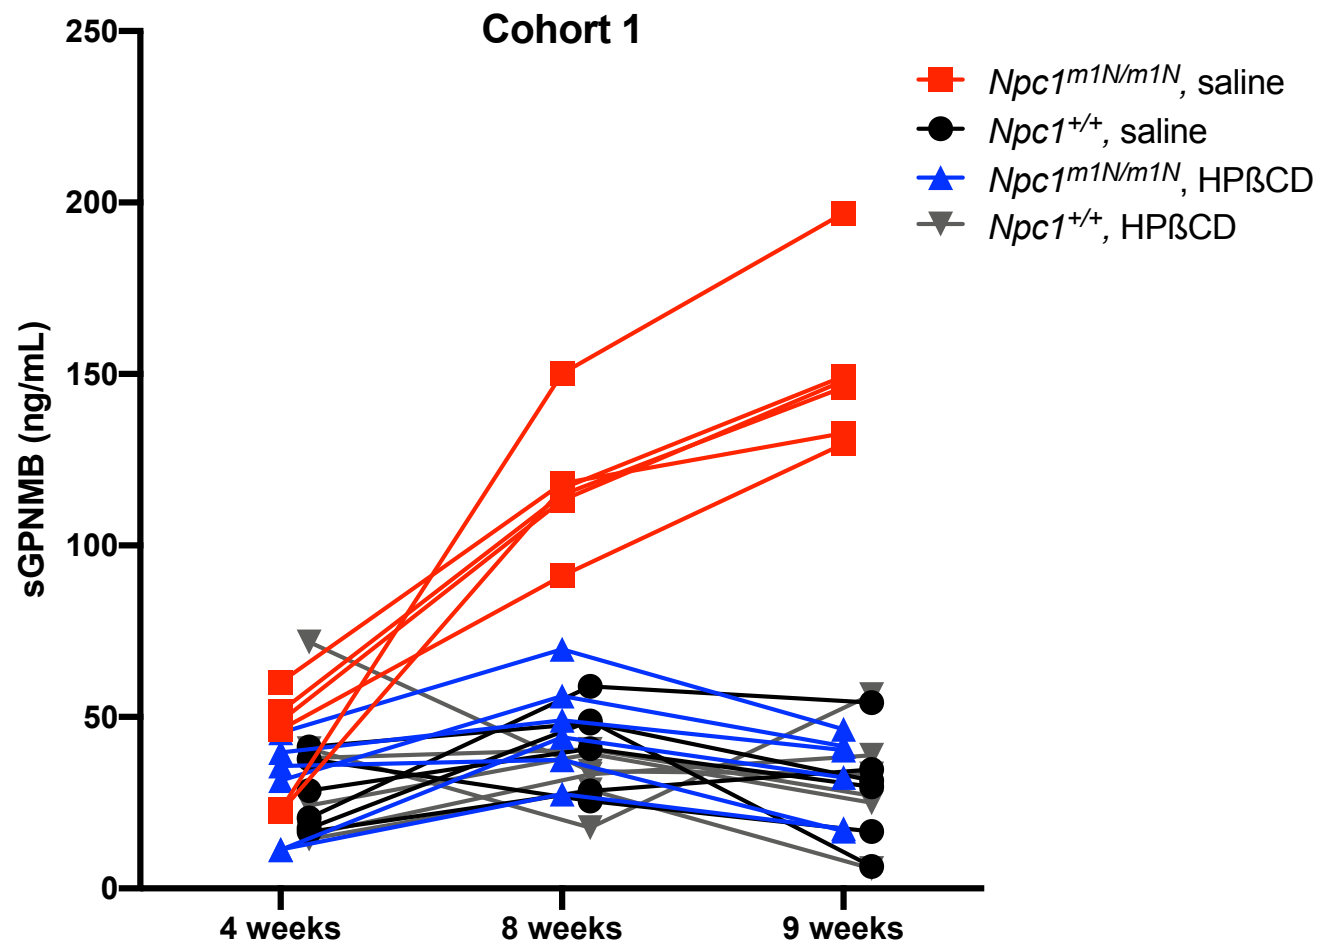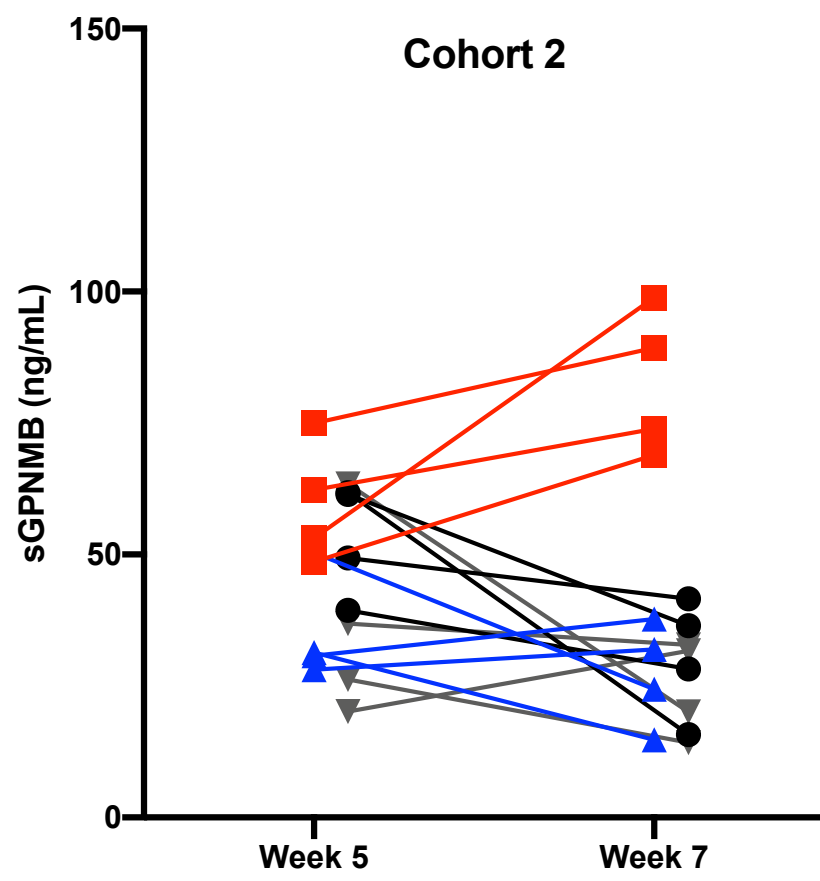

Supplement: supplemental_fig_s6_ddab194.pdf [file supplemental_fig_s6_ddab194.pdf]
